# Supplementary material for: mTOR Inhibition Impairs the Activation and Function of Belatacept-Resistant CD4+CD57+ T Cells In Vivo and In Vitro
Source: MDPI journal article supplement (doi:10.3390/pharmaceutics15041299), 2023-04-20
Supplement: s1 [file s1]

## Supplementary figure

A

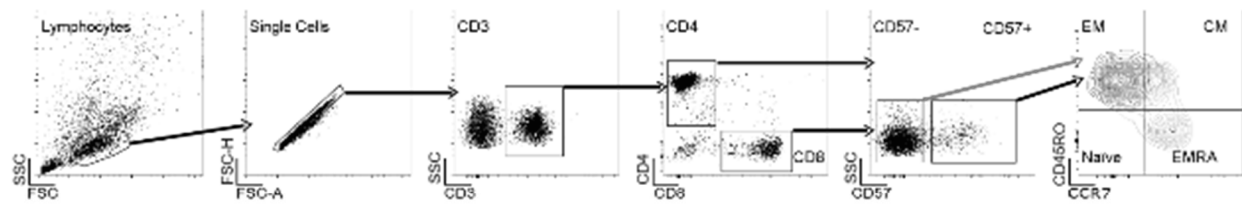

B

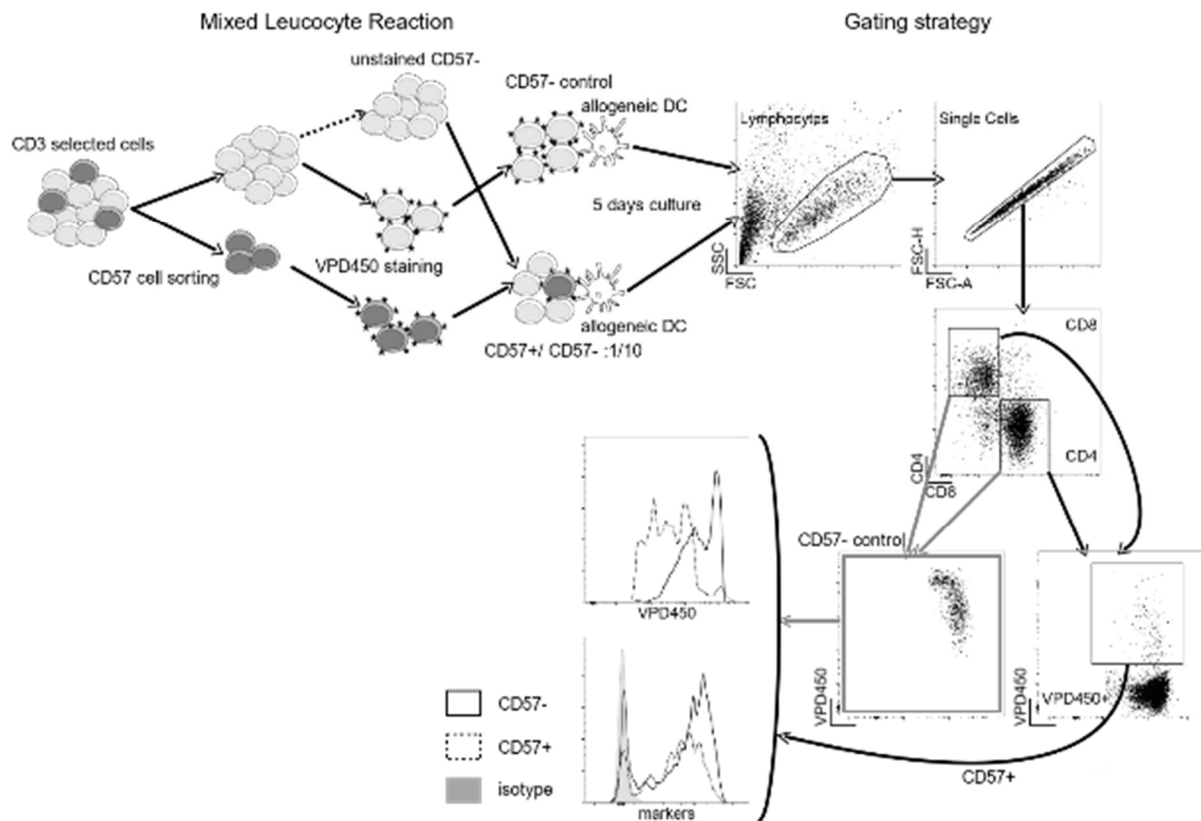

**Figure S1.** Gating strategies and MLR culture protocol diagram. (A) Gating strategy used to define memory T cells populations. (B) MLR culture protocol and gating strategy is depicted.
